# Supplementary material for: The diagnostic dilemma of idiopathic intracranial hypertension in a child with acute lymphoblastic leukemia: COVID-19 or cytosine arabinoside?
Source: Springer Nature journal article supplement (doi:10.1186/s12883-022-02689-z), 2022-05-02
Supplement: MOESM1 [file 20363254]

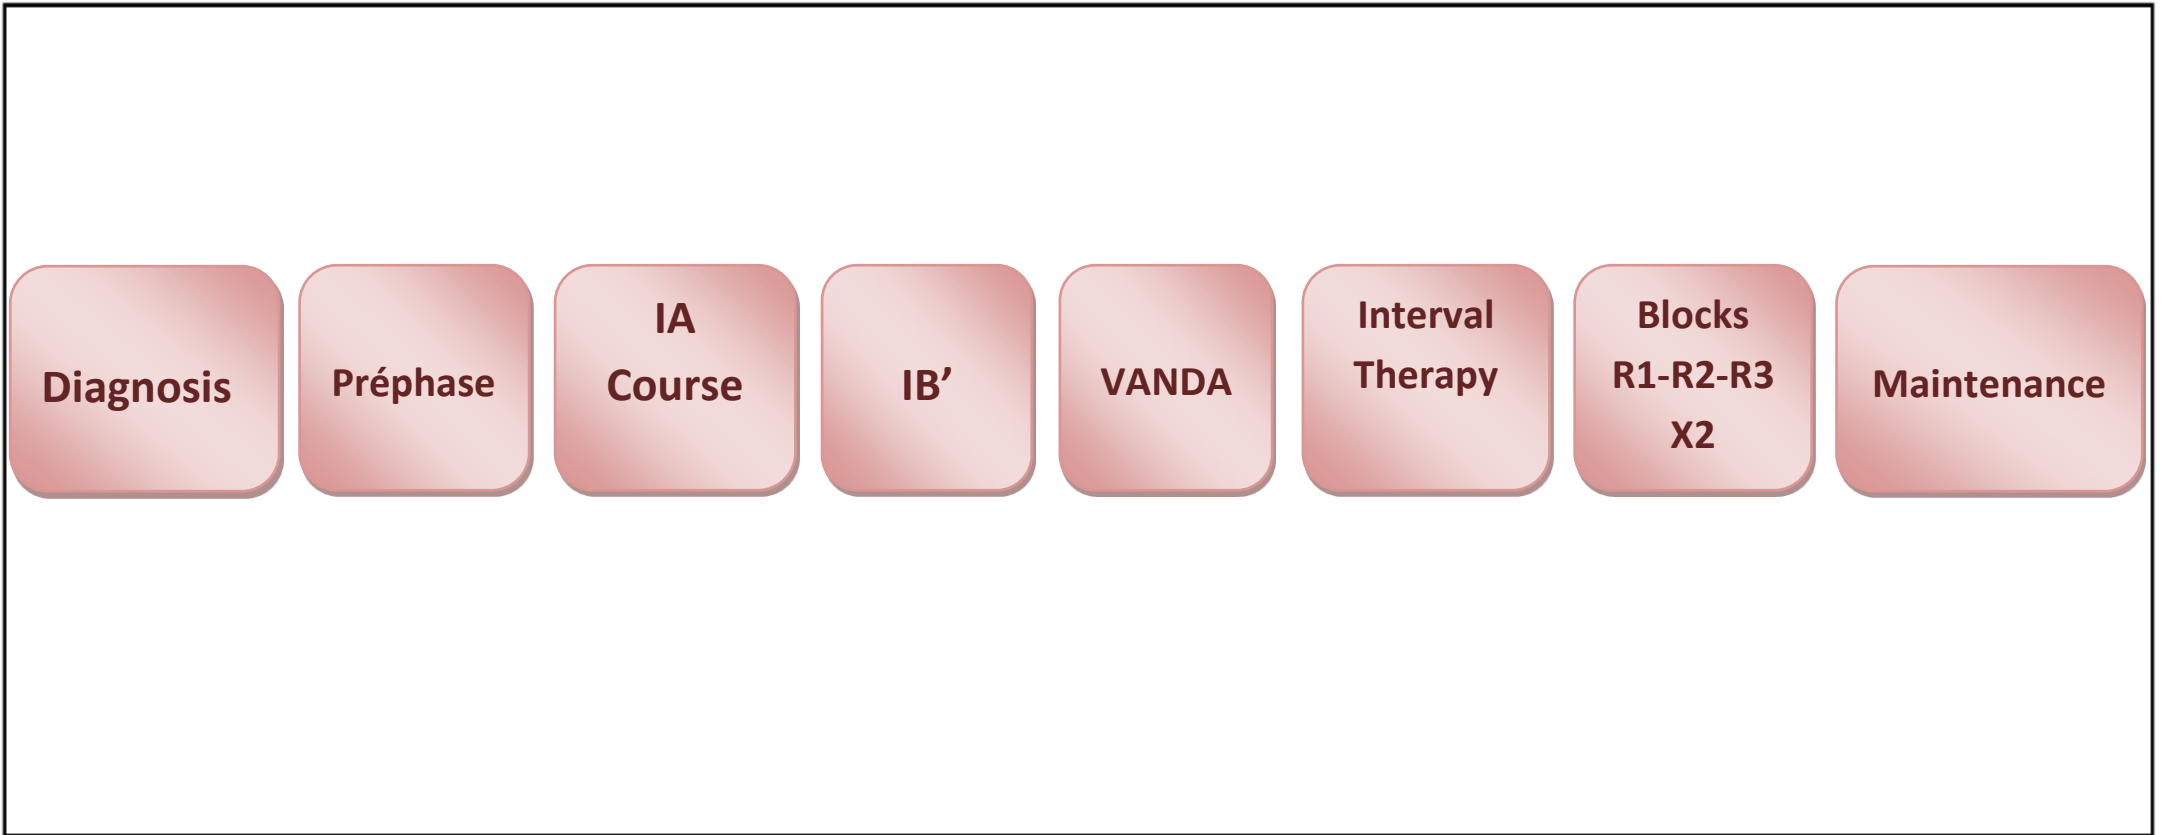

Annex 1: VHR arm treatment according to EORTC 58951 Protocol
