# Supplementary material for: The diagnostic dilemma of idiopathic intracranial hypertension in a child with acute lymphoblastic leukemia: COVID-19 or cytosine arabinoside?
Source: Springer Nature journal article supplement (doi:10.1186/s12883-022-02689-z), 2022-05-02
Supplement: MOESM2 [file 20363254]

|                  | Drug             | Dose                      | Route                     | Number of administrations | Days      |
|------------------|------------------|---------------------------|---------------------------|---------------------------|-----------|
| R1               | DXM              | 10 mg/m <sup>2</sup> /12h | p.o                       | 10                        | 1 to 5    |
|                  | 6-MP             | 100 mg/m <sup>2</sup>     | p.o                       | 5                         | 1 to 5    |
|                  | VCR              | 1.5 mg/m <sup>2</sup>     | i.v                       | 2                         | 1 and 6   |
|                  | HD-MTX           | 5 g/m <sup>2</sup>        | i.v                       | 1                         | 1(24h)    |
|                  | Triple i.t chemo | -                         | i.t                       | 1                         | 2         |
|                  | HiDAC            | 2 g/m <sup>2</sup> /12h   | i.v                       | 2                         | 5         |
|                  | L-A'ase          | 25,000 UI/m <sup>2</sup>  | i.v                       | 1                         | 6         |
|                  | R2               | DXM                       | 10 mg/m <sup>2</sup> /12h | p.o                       | 10        |
| 6-TG             |                  | 100 mg/m <sup>2</sup>     | p.o                       | 5                         | 1 to 5    |
| VCR              |                  | 1.5 mg/m <sup>2</sup>     | i.v                       | 1                         | 1         |
| HD-MTX           |                  | 5 g/m <sup>2</sup>        | i.v                       | 1                         | 1(24h)    |
| Triple i.t chemo |                  | -                         | i.t                       | 1                         | 2         |
| CPM              |                  | 500 mg/m <sup>2</sup>     | i.v                       | 2                         | 3 and 4   |
| DNR              |                  | 50 mg/m <sup>2</sup>      | i.v                       | 1                         | 5         |
| L-A'ase          |                  | 25,000 UI/m <sup>2</sup>  | i.v                       | 1                         | 6         |
| R3               | DXM              | 10 mg/m <sup>2</sup> /12h | p.o                       | 10                        | 1 to 5    |
|                  | HiDAC            | 2 g/m <sup>2</sup> /12h   | i.v                       | 4                         | 1 and 2   |
|                  | VP-16            | 150 mg/m <sup>2</sup>     | i.v                       | 3                         | 3,4 and 5 |
|                  | Triple i.t chemo | -                         | i.t                       | 1                         | 2         |
|                  | L-A'ase          | 25,000 UI/m <sup>2</sup>  | i.v                       | 1                         | 6         |

I.t chemo: intra-thecal chemotherapy, i.v: intravenous, P.o: per os, DXM: Dexamethasone, 6-MP: 6-Mercaptopurine, VCR: Vincristine, HD-MTX: High Dose Methotrexate, HiDAC: High Dose Cytosine Arabinoside, L-A'ase : L Asparaginase, 6-TG: 6-Thioguanine, CPM: Cyclophosphamide, DNR :Daunorubicine.

### **Blocks R1-R2-R3 of VHR arm according to EORTC 58951 protocol**
